# Supplementary material for: Analysis of NO and its metabolites by mass spectrometry. Comment on ‘Detection of nitric oxide in tissue samples by ESI-MS’ by Z. Shen, A. Webster, K. J. Welham, C. E. Dyer, J. Greenman and S. J. Haswell
Source: Royal Society of Chemistry journal article supplement (doi:10.1039/c0an00411a), 2010-10-08
Supplement: c0an00411a.pdf [file c0an00411a.pdf]

## Analysis of NO and its metabolites by mass spectrometry. Comment on 'Analysis of nitric oxide in tissue samples by ESI-MS' by Z. Shen, A. Webster, K. J. Welham, C. E. Dyer, J. Greenman and S. J. Haswell

Dimitrios Tsikas,\* Jörg Sandmann, Bibiana Beckmann

Institute of Clinical Pharmacology, Hannover Medical School, Carl-Neuberg-Str. 1,  
30625 Hannover, Germany. E-mail: [tsikas.dimitros@mh-hannover.de](mailto:tsikas.dimitros@mh-hannover.de);  
Fax: +49 511 532 2750 Tel.: +49 511 532 3959

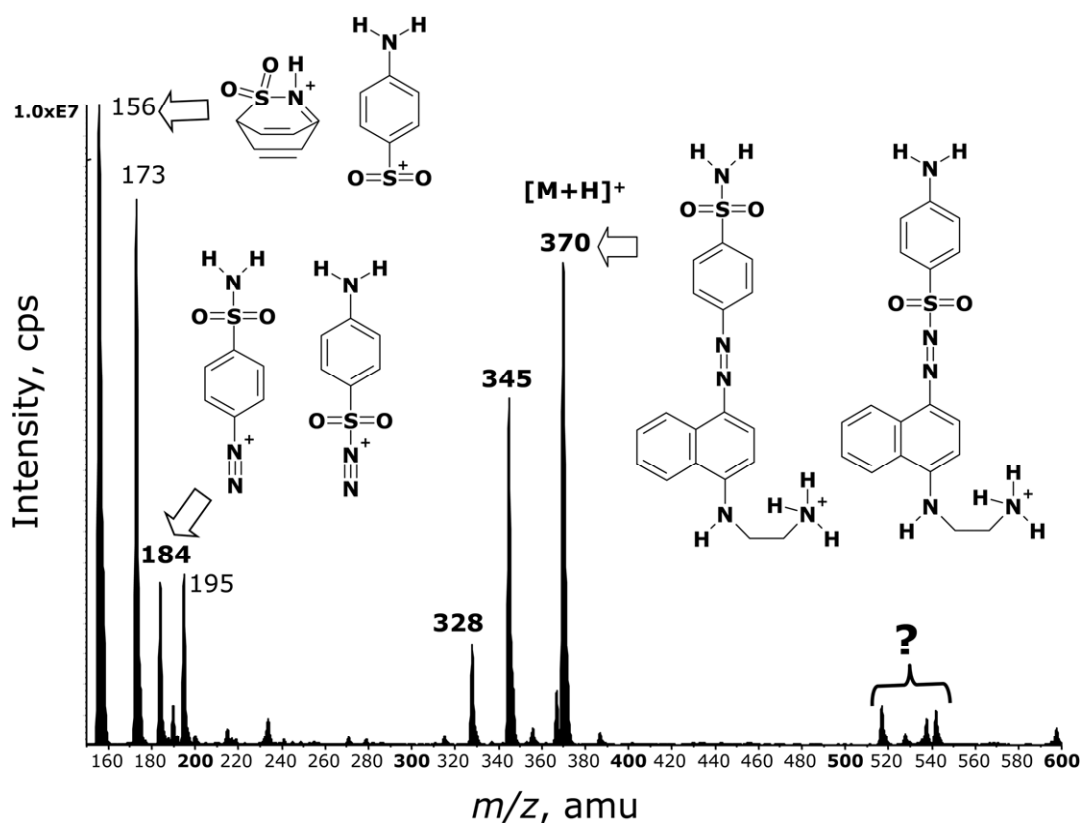

**Fig. S1** Positive-ion FIA-ESI-MS spectrum of the reaction mixture from the diazotization of nitrite with sulfanilamide and *N*-(1-naphthyl)ethyldiamine as described by Iyenga *et al.*<sup>14</sup> and proposed structures for some of the cations observed between *m/z* 150 and *m/z* 400. For simplicity, the mass fragments *below* *m/z* 150 are not shown as they are due to the derivatization reagents sulfanilamide acid and *N*-(1-naphthyl)ethyldiamine. FIA-ESI-MS was performed in the positive-ion mode on an API 2000 tandem mass spectrometer from Applied Biosystems/MDS Sciex (Concord, Canada).
